# Supplementary material for: The 2022 M W 6.0 Gölyaka–Düzce earthquake: an example of a medium-sized earthquake in a fault zone early in its seismic cycle
Source: Copernicus journal article supplement (doi:10.5194/se-14-1103-2023), 2023-10-25
Supplement: Supplementary file 1 [file se-14-1103-2023-supplement.zip]

Archive with 3 entries (3 files):
- catalog_absolute_locations.txt
- se-14-1103-2023-supplement-title-page.pdf
- supplement.pdf
