# Supplementary material for: The 2022 M W 6.0 Gölyaka–Düzce earthquake: an example of a medium-sized earthquake in a fault zone early in its seismic cycle
Source: Copernicus journal article supplement (doi:10.5194/se-14-1103-2023), 2023-10-25
Supplement: Supplementary file 1 [file se-14-1103-2023-supplement.zip › catalog_absolute_locations.txt]

Enhanced catalog after calculating absolute locations with NonLinLoc
and estimating moment magnitudes for these events.
---------------------------------------------------------------------
ID  Longitude(°)  Latitude(°)  Depth(km)  Date(yyyymmddTHHMMSS)  Magnitude(MW)
----------------------------------------------------------------------
 0 31.446318 40.807723 9.79 20221023T034159 1.2
 2 30.429329 40.437070 26.46 20221023T050137 2.0
 16 30.410445 40.676061 6.85 20221023T111310 1.2
 20 31.600311 40.912665 5.42 20221023T145129 1.3
 22 30.615693 40.546645 25.21 20221023T161715 1.4
 29 31.627423 40.872486 1.20 20221023T171801 1.4
 30 31.779022 40.814504 1.30 20221023T220520 1.0
 32 31.693999 40.803026 9.44 20221024T025330 1.2
 33 32.203688 40.610915 1.22 20221024T042625 1.4
 45 31.148161 40.592951 8.53 20221024T083744 1.1
 51 30.833517 40.165258 4.89 20221024T100053 2.3
 52 31.004097 40.517807 0.64 20221024T100515 2.5
 54 30.811353 40.191870 2.82 20221024T101101 1.9
 61 30.425907 40.535838 21.38 20221024T124317 1.3
 62 31.694453 40.802841 9.31 20221024T121800 1.4
 73 30.858993 40.659578 -0.69 20221024T232526 1.0
 74 31.364185 40.057518 0.83 20221024T231123 1.6
 77 31.691073 40.868228 12.02 20221025T015735 1.2
 79 31.210239 40.968525 1.26 20221025T013540 1.5
 83 30.538357 40.424115 14.62 20221025T044917 1.0
 86 31.326637 40.800292 12.82 20221025T052053 1.3
 100 31.469063 40.967348 6.24 20221025T091937 1.8
 112 30.514850 40.890389 9.97 20221025T144703 1.6
 118 30.396053 40.826415 7.51 20221025T150227 1.2
 121 31.696734 40.859517 2.20 20221025T181326 1.1
 124 32.005889 40.206077 1.03 20221025T194720 2.3
 127 31.574930 40.842322 1.07 20221025T204516 0.9
 129 31.729048 40.790126 12.28 20221026T014547 1.1
 136 30.408200 40.854799 6.32 20221026T084725 1.5
 137 31.024804 40.564014 15.36 20221026T085234 1.2
 140 30.336592 40.624775 1.10 20221026T095645 1.7
 144 29.843787 40.773985 30.75 20221026T102808 3.0
 153 31.571333 40.772717 12.43 20221026T144943 1.1
 154 30.593918 40.948143 7.32 20221026T144742 1.2
 157 31.858591 40.881562 5.09 20221026T190032 2.0
 159 31.530450 40.857919 10.67 20221026T225351 1.3
 160 30.779542 40.705114 11.24 20221026T231302 1.5
 162 31.743216 40.865433 1.26 20221027T011631 1.1
 163 31.765272 40.772459 7.51 20221027T013858 1.2
 165 31.750890 40.174283 3.25 20221027T041948 1.6
 177 31.285501 40.867285 9.11 20221027T093555 1.6
 180 31.739926 40.796348 7.80 20221027T100431 1.8
 198 31.780918 40.837922 -0.30 20221027T234610 0.8
 199 30.634793 40.878262 31.61 20221027T230300 1.8
 226 30.525395 40.906704 8.37 20221028T144429 1.5
 234 31.655681 40.803734 15.95 20221028T200208 0.7
 235 31.773862 40.756845 3.76 20221028T214030 1.0
 247 31.381536 40.778782 7.58 20221029T075452 1.9
 256 30.838880 40.194234 5.79 20221029T101106 2.0
 257 30.891027 40.193038 11.07 20221029T101553 2.6
 258 30.814281 40.164513 4.78 20221029T102130 1.9
 278 30.967778 40.722903 1.10 20221030T011725 1.7
 281 31.607452 40.870310 -1.04 20221030T025555 0.8
 299 31.646889 40.791679 18.41 20221030T102632 1.0
 301 31.527016 40.969080 2.75 20221030T111200 2.2
 316 31.628043 40.794033 12.18 20221030T193929 1.5
 318 31.702899 40.874782 0.79 20221030T205431 0.8
 319 31.776257 40.770095 4.15 20221030T201628 1.0
 324 31.163225 40.832163 -0.69 20221031T003656 1.7
 325 31.877324 40.477998 7.78 20221031T024429 1.9
 327 31.700749 40.741236 12.57 20221031T033742 1.3
 351 31.169078 40.441997 24.62 20221031T080402 1.2
 354 30.540868 40.895648 14.35 20221031T092134 1.4
 355 31.009133 40.501613 2.12 20221031T094847 2.1
 356 30.576395 40.479618 28.68 20221031T095833 2.2
 357 30.754710 40.513809 2.08 20221031T102921 1.3
 360 32.063545 40.932724 4.97 20221031T105828 0.8
 362 31.864531 40.760945 35.79 20221031T114034 1.2
 375 30.892010 40.751823 -0.97 20221031T135902 1.4
 377 30.646350 41.084987 4.85 20221031T145517 1.8
 384 31.009392 40.849281 13.57 20221031T161936 1.6
 388 31.794978 40.704070 7.17 20221031T184206 1.4
 397 31.411568 40.734305 7.22 20221101T002828 1.5
 398 30.746376 40.972560 -0.50 20221101T003610 0.7
 399 31.487681 40.857879 12.67 20221101T023302 1.6
 413 30.830604 40.175984 4.99 20221101T095933 2.0
 418 30.475944 40.845731 1.18 20221101T130743 1.6
 424 30.627973 40.654828 11.20 20221101T192102 1.4
 426 31.544317 40.778741 13.23 20221101T191927 1.1
 429 30.192484 40.706164 8.92 20221101T220150 1.0
 441 31.080569 40.938356 14.11 20221102T073735 1.4
 444 31.698655 40.895716 1.20 20221102T093727 1.0
 462 31.719676 40.832368 11.10 20221102T212757 1.3
 463 31.105430 40.867974 13.34 20221103T001415 1.6
 464 31.729738 40.852443 1.96 20221103T025713 1.1
 469 30.423054 41.532083 11.46 20221103T045131 2.7
 470 31.747574 40.712470 7.37 20221103T041158 1.6
 482 30.985984 40.730120 11.28 20221103T175435 1.5
 486 31.373305 40.865875 20.48 20221103T202150 1.8
 487 32.116724 41.060542 7.20 20221103T223048 1.5
 490 30.245844 40.450398 28.33 20221104T003006 3.8
 499 31.343289 40.985879 38.88 20221104T083841 1.6
 501 30.338102 40.631234 -0.28 20221104T094728 1.7
 506 32.367186 40.692094 7.67 20221104T103922 1.8
 512 31.727095 40.855657 1.22 20221104T150822 1.1
 513 31.215718 41.049997 1.07 20221104T155442 1.8
 527 31.667828 40.789711 10.74 20221105T073134 1.6
 537 30.821560 40.162998 4.62 20221105T103126 2.4
 547 30.493095 40.910274 26.38 20221105T144412 1.6
 557 30.990558 40.806542 9.78 20221106T004244 1.0
 559 31.062700 40.884233 12.84 20221106T024937 2.2
 561 30.970321 40.746668 4.23 20221106T054048 1.0
 574 31.716011 40.821774 8.59 20221106T142136 1.2
 581 31.780465 40.871551 15.17 20221106T225235 1.2
 582 31.732020 40.409732 2.51 20221107T030320 2.7
 584 30.793338 40.099367 34.19 20221107T100409 2.0
 586 31.633973 40.721586 -0.38 20221107T100339 0.9
 595 31.685334 40.805854 9.54 20221107T145647 1.1
 597 31.855319 40.132509 5.28 20221108T015523 2.8
 606 30.924725 40.219090 12.63 20221108T102746 2.4
 611 31.806104 40.788113 1.01 20221108T122448 1.3
 616 31.666688 40.697200 1.44 20221108T174938 1.1
 618 31.814780 40.818720 -1.18 20221108T205731 1.2
 622 31.939689 40.758539 18.00 20221109T025545 1.2
 635 30.664890 40.861381 5.01 20221109T095040 1.3
 645 31.708157 40.730383 6.73 20221109T134921 1.1
 652 31.670245 40.832990 11.71 20221109T211534 1.3
 653 31.683172 40.913408 1.77 20221110T002506 1.0
 656 30.790967 40.528308 8.06 20221110T044803 1.2
 657 30.579757 40.681753 9.41 20221110T061106 1.9
 667 32.172543 40.966225 0.60 20221110T085517 0.8
 670 32.335512 40.667439 4.35 20221110T093209 1.9
 671 30.290312 40.589417 7.49 20221110T094432 1.6
 672 31.272195 41.020200 50.21 20221110T094842 1.2
 676 31.496123 40.972723 6.51 20221110T104015 1.9
 677 30.986721 40.458934 4.03 20221110T111820 1.8
 686 31.822323 40.482157 12.94 20221110T160213 1.6
 687 31.073239 40.828815 8.73 20221110T173600 1.9
 690 31.028296 40.862957 15.28 20221110T173846 1.7
 692 31.103187 40.906965 12.30 20221110T182011 2.0
 694 31.100843 40.891252 13.31 20221110T182544 2.0
 695 31.196397 40.772718 7.90 20221110T184516 1.7
 698 30.973264 40.799660 6.75 20221110T191033 1.2
 699 31.685193 40.831157 11.93 20221110T203013 1.2
 702 31.562092 40.808814 9.25 20221110T235233 1.1
 704 30.484366 40.662709 1.20 20221111T011350 1.6
 712 30.928599 40.900715 18.84 20221111T045617 0.8
 716 30.630304 40.712911 11.20 20221111T070910 2.2
 732 30.972433 40.755735 6.57 20221111T095533 1.4
 734 31.409266 40.940065 6.89 20221111T110519 1.8
 737 31.762677 40.843960 1.26 20221111T120733 1.7
 743 31.058464 41.032226 14.00 20221111T135030 1.9
 744 31.568985 40.831948 13.33 20221111T141048 1.4
 759 31.562211 40.872367 1.26 20221111T222817 1.5
 768 31.534180 40.840417 1.22 20221112T072231 1.1
 775 31.791777 40.787933 4.23 20221112T101231 1.1
 782 30.835891 40.556313 9.85 20221112T121456 1.8
 784 31.229824 41.000362 9.78 20221112T150253 2.0
 786 31.887648 40.793817 1.20 20221112T212918 1.1
 790 31.789714 40.838236 -0.75 20221113T011332 1.2
 802 30.953241 40.698991 7.63 20221113T125250 1.3
 811 31.597659 40.915876 13.51 20221113T192320 1.2
 812 31.833536 40.846980 13.98 20221113T210855 1.2
 824 30.693010 40.913136 9.66 20221114T035801 1.6
 842 30.387291 40.882967 10.24 20221114T090907 2.0
 857 31.675226 40.841980 15.19 20221114T142035 1.3
 859 31.775250 40.857318 1.22 20221114T165700 1.0
 862 31.553665 40.781687 10.50 20221114T181905 1.1
 864 30.365628 40.716331 9.21 20221114T215109 1.4
 865 30.374886 40.717972 8.62 20221114T221625 1.7
 866 30.364942 40.716602 9.30 20221114T222303 2.0
 867 31.727748 40.848988 7.28 20221115T050254 0.8
 873 30.734385 40.688819 15.01 20221115T072849 1.5
 880 30.525140 40.895505 1.26 20221115T094845 1.6
 885 31.549361 40.972094 -0.93 20221115T105953 1.7
 886 31.335819 40.878189 16.38 20221115T115328 1.2
 892 30.401851 40.882705 7.08 20221115T132738 1.5
 896 30.576640 40.961331 1.10 20221115T145421 1.2
 898 31.738411 40.759263 10.81 20221115T153457 1.3
 906 31.777514 40.845007 -0.46 20221115T235720 1.0
 916 31.111117 40.953036 7.84 20221116T091448 2.4
 929 31.887840 40.637440 7.94 20221116T185630 0.9
 931 32.090511 41.115522 7.78 20221116T220203 0.9
 932 31.665817 40.721734 13.55 20221117T013148 2.2
 945 31.405491 40.835100 4.00 20221117T095254 2.0
 952 31.719434 40.860564 12.10 20221117T120913 1.5
 961 30.720740 40.912029 1.14 20221117T220726 1.5
 971 30.490748 41.137136 44.66 20221118T093747 2.0
 976 31.736785 40.843873 3.45 20221118T115508 1.1
 983 31.777683 40.793349 1.20 20221118T205115 1.3
 991 31.753524 40.812485 -0.52 20221119T090532 2.0
 994 30.829786 40.196480 5.64 20221119T102329 1.9
 1000 31.665330 40.866283 7.46 20221119T160533 2.0
 1005 32.470750 40.910422 3.53 20221120T011926 1.8
 1007 31.872588 40.884368 15.28 20221120T015242 1.0
 1008 31.680614 40.861116 6.91 20221120T045812 1.7
 1015 30.968655 40.847178 11.85 20221120T095033 2.0
 1019 31.714632 40.833362 10.89 20221120T122552 1.7
 1032 31.672093 40.890902 0.09 20221121T055719 1.3
 1034 31.186385 40.819650 8.35 20221121T062346 1.6
 1040 31.362812 40.935416 10.40 20221121T083332 2.0
 1041 30.570741 40.946708 1.34 20221121T091152 1.0
 1046 30.786230 40.349820 -0.30 20221121T102449 2.9
 1047 31.891398 40.120399 4.50 20221121T103108 2.6
 1058 31.499843 40.911192 36.07 20221121T134518 1.2
 1065 31.864699 40.786506 8.41 20221122T004152 1.2
 1073 30.455206 40.656953 1.26 20221122T081550 1.3
 1074 30.638589 40.579933 15.21 20221122T081929 1.8
 1078 31.937495 40.782234 1.18 20221122T101355 1.1
 1079 30.415357 40.865389 9.07 20221122T101621 1.6
 1081 31.868310 40.698163 12.47 20221122T113314 0.9
 1094 31.681035 40.871612 1.20 20221122T223242 1.1
 1096 31.020784 40.813197 12.80 20221123T010814 5.8
 1097 31.074982 40.847778 13.37 20221123T011312 3.6
 1098 31.023438 40.809300 13.74 20221123T011511 3.3
 1099 31.052060 40.816237 13.91 20221123T011503 2.8
 1102 30.973998 40.761835 8.94 20221123T011228 3.8
 1103 31.159301 40.868123 11.98 20221123T011859 2.2
 1105 31.028585 40.826715 11.20 20221123T012045 2.5
 1107 31.052486 40.837674 12.20 20221123T013034 3.9
 1108 31.087350 40.829350 11.26 20221123T013034 3.8
 1111 31.061110 40.892664 12.45 20221123T014855 2.4
 1112 31.052848 40.804232 12.26 20221123T014913 2.5
 1113 31.074083 40.811294 12.48 20221123T020126 2.8
 1115 31.068670 40.800537 7.21 20221123T021053 1.5
 1117 31.049746 40.793433 6.87 20221123T021423 1.8
 1119 31.116677 40.865407 12.02 20221123T021503 2.5
 1122 31.121154 40.860773 11.94 20221123T021645 3.1
 1123 31.125648 40.907694 11.84 20221123T021816 2.1
 1125 31.022710 40.777539 10.76 20221123T022153 2.5
 1128 31.080276 40.824751 11.83 20221123T022431 2.1
 1129 31.109266 40.850311 12.16 20221123T022459 2.0
 1130 31.655740 41.154945 5.21 20221123T022552 1.4
 1131 31.300865 40.883788 19.11 20221123T022733 1.5
 1132 31.036344 40.808374 7.49 20221123T023123 1.6
 1133 31.056262 40.795068 8.04 20221123T022819 1.8
 1134 31.103755 40.880871 9.93 20221123T023647 3.1
 1135 30.967468 40.791006 13.27 20221123T025024 2.4
 1137 31.007268 40.793825 10.34 20221123T025126 1.6
 1138 30.832888 40.783931 9.62 20221123T025320 1.5
 1139 31.049116 40.863467 0.85 20221123T025601 1.5
 1142 31.100810 40.890203 13.59 20221123T025757 1.6
 1145 30.983635 40.767711 8.61 20221123T025941 3.0
 1146 30.971967 40.802658 2.43 20221123T025715 1.5
 1149 31.010434 40.799285 12.64 20221123T030324 2.7
 1150 31.009928 40.774698 11.57 20221123T030855 2.7
 1153 31.045814 40.876479 12.30 20221123T031535 2.3
 1154 31.011061 40.812491 9.00 20221123T031505 1.8
 1156 30.993816 40.807361 7.06 20221123T031635 1.6
 1157 31.091217 40.820002 12.26 20221123T031737 1.8
 1159 30.864059 40.759103 10.34 20221123T031851 2.4
 1161 31.033150 40.817270 9.84 20221123T032323 2.3
 1163 31.034371 40.849897 14.46 20221123T032439 2.0
 1165 31.057172 40.817197 10.67 20221123T032512 2.3
 1168 30.966514 40.789971 7.26 20221123T032613 1.4
 1169 30.988109 40.786277 1.26 20221123T034647 1.3
 1171 31.143987 40.851951 11.94 20221123T034712 2.2
 1175 31.084600 40.822660 11.99 20221123T034855 2.1
 1178 31.093285 40.841848 11.81 20221123T034944 3.8
 1180 30.934465 40.799613 11.59 20221123T035057 4.5
 1181 31.095570 40.900100 13.94 20221123T032811 1.5
 1184 31.145398 40.939279 1.22 20221123T032721 1.3
 1185 31.008611 40.807807 8.19 20221123T032936 1.3
 1186 30.897448 40.731953 3.78 20221123T033047 1.4
 1187 31.149703 40.871628 12.04 20221123T033113 1.4
 1188 31.112161 40.927459 7.22 20221123T033440 1.4
 1190 30.978230 40.787934 9.67 20221123T033449 1.9
 1193 31.075001 40.878237 7.08 20221123T033757 1.9
 1198 30.924719 40.749710 2.06 20221123T034241 1.3
 1200 31.078287 40.835115 17.90 20221123T034346 1.4
 1202 31.098482 40.845430 12.88 20221123T035615 1.6
 1203 31.136818 40.859086 11.59 20221123T035704 1.6
 1204 31.007200 40.806956 6.57 20221123T035729 1.3
 1205 31.111004 40.846779 15.21 20221123T035914 1.2
 1207 30.991387 40.787797 6.94 20221123T040027 1.9
 1211 31.117806 40.842628 12.76 20221123T040629 1.7
 1214 30.852157 40.712554 5.36 20221123T041409 1.2
 1216 31.107199 40.791966 9.30 20221123T042406 2.2
 1217 31.108655 40.845596 12.45 20221123T042638 2.0
 1220 31.010707 40.823788 11.68 20221123T042838 2.9
 1222 31.136908 40.861885 13.31 20221123T043409 1.7
 1223 31.010857 40.821072 11.20 20221123T043326 1.8
 1225 31.050015 40.726730 8.25 20221123T043513 3.0
 1228 31.059755 40.878684 12.57 20221123T043716 2.9
 1230 31.107643 40.842813 13.16 20221123T043813 2.6
 1232 31.071725 40.817201 11.36 20221123T044013 1.8
 1235 31.090173 40.816170 12.06 20221123T044738 1.8
 1238 30.948048 40.758423 4.41 20221123T044912 1.8
 1240 31.035942 40.825536 11.44 20221123T045745 2.5
 1242 31.067064 40.815883 11.32 20221123T045842 2.7
 1244 31.007783 40.780162 7.18 20221123T040732 1.4
 1246 30.991356 40.786747 11.32 20221123T041018 1.5
 1251 31.085196 40.797265 11.80 20221123T041555 1.5
 1254 30.750693 40.978271 7.06 20221123T041741 0.9
 1256 31.043844 40.781633 9.37 20221123T041837 1.5
 1258 31.050733 40.795516 13.04 20221123T044255 1.4
 1260 30.957490 40.765616 8.27 20221123T045533 1.9
 1265 30.553302 40.554502 30.99 20221123T050216 1.4
 1266 31.029584 40.798689 9.29 20221123T050320 1.5
 1267 31.144868 40.966073 18.82 20221123T050425 1.8
 1271 30.982882 40.781290 10.66 20221123T050618 2.5
 1274 31.003966 40.822416 11.50 20221123T050703 1.8
 1275 30.999722 40.819514 10.81 20221123T051302 2.0
 1277 31.033054 40.821736 7.22 20221123T051546 1.8
 1279 31.096046 40.841448 10.52 20221123T051619 1.3
 1280 31.133000 40.855305 13.59 20221123T051743 2.5
 1282 30.976271 40.744991 1.20 20221123T053307 1.7
 1283 31.588289 40.769364 10.62 20221123T053318 1.4
 1284 31.116449 40.887468 10.54 20221123T053528 2.0
 1286 31.028612 40.903914 20.40 20221123T054932 1.8
 1288 31.093851 40.845163 12.96 20221123T054954 3.2
 1292 31.081787 40.858510 12.08 20221123T055550 2.2
 1293 31.210748 40.759841 1.26 20221123T055742 1.6
 1295 31.060714 40.797178 10.57 20221123T055824 2.3
 1298 31.136263 40.870650 13.16 20221123T053721 1.6
 1299 30.993148 40.769386 10.09 20221123T053859 1.2
 1301 31.068916 40.853400 13.26 20221123T054130 1.5
 1303 30.901574 40.731010 0.64 20221123T051132 1.6
 1308 31.037199 40.813698 10.76 20221123T060321 2.4
 1310 31.143208 40.856517 12.30 20221123T061438 2.8
 1315 31.454341 40.856488 14.39 20221123T062908 1.1
 1317 31.047245 40.809845 10.96 20221123T062926 2.5
 1321 31.049472 40.844905 13.47 20221123T064207 2.1
 1324 30.988120 40.802207 10.42 20221123T064318 2.5
 1326 31.086417 40.843897 12.84 20221123T065810 2.6
 1329 31.030933 40.736519 12.90 20221123T061301 1.6
 1330 30.999186 40.786087 11.10 20221123T061321 1.4
 1331 30.981179 40.801801 6.89 20221123T061723 1.6
 1332 30.981719 40.804418 5.93 20221123T061915 1.2
 1333 31.015739 40.783700 1.26 20221123T062020 1.0
 1334 31.103053 40.799657 3.45 20221123T062203 1.7
 1335 30.993335 40.767894 7.97 20221123T063204 2.0
 1336 31.208700 40.585509 3.14 20221123T063304 1.8
 1338 31.112720 40.798606 7.57 20221123T064809 1.4
 1343 30.931687 40.759309 5.70 20221123T065337 1.4
 1345 31.124497 40.820449 11.71 20221123T065653 1.8
 1349 31.103960 40.813820 -0.01 20221123T060205 1.4
 1351 31.187481 40.853241 10.62 20221123T070140 1.7
 1353 31.029328 40.828365 11.13 20221123T071219 2.3
 1356 31.001987 40.810284 9.86 20221123T071949 2.1
 1358 31.689844 40.757073 27.32 20221123T072159 2.0
 1360 31.024689 40.820131 11.44 20221123T072147 2.5
 1362 30.896564 40.880236 49.00 20221123T072305 1.6
 1363 31.087045 40.819552 13.14 20221123T072353 1.4
 1365 30.965870 40.807400 13.93 20221123T072816 1.9
 1367 31.028161 40.812718 9.95 20221123T073514 2.4
 1370 31.133233 40.855388 12.38 20221123T075134 2.3
 1372 31.056997 40.803983 14.00 20221123T075540 1.8
 1373 31.034519 40.809106 11.94 20221123T075616 1.9
 1374 31.114353 40.806454 6.10 20221123T074359 1.0
 1375 30.974732 40.771101 3.29 20221123T074728 1.3
 1378 30.974662 40.815741 -1.10 20221123T070750 1.7
 1379 30.752864 40.937455 -0.81 20221123T070858 1.4
 1382 31.009634 40.826520 13.84 20221123T072712 1.5
 1383 30.970852 40.780445 8.70 20221123T072927 1.8
 1385 31.055942 40.807240 12.54 20221123T073010 1.3
 1388 30.988234 40.806057 6.40 20221123T073933 1.7
 1395 31.147196 40.865547 14.21 20221123T080114 1.8
 1396 31.010956 40.808991 8.92 20221123T081125 1.4
 1398 31.083744 40.861976 15.28 20221123T081538 2.1
 1400 31.072843 40.823483 12.14 20221123T081538 2.4
 1401 31.153508 40.860528 13.23 20221123T081835 1.8
 1403 31.059463 40.839126 12.22 20221123T082414 2.3
 1406 31.081020 40.826400 11.60 20221123T082607 1.8
 1409 31.097558 40.845447 11.20 20221123T083158 1.7
 1413 30.983399 40.814367 3.84 20221123T083701 1.2
 1414 31.035240 40.802441 10.03 20221123T085110 1.8
 1415 31.051714 40.812479 10.09 20221123T085139 1.1
 1416 31.081308 40.813353 10.87 20221123T080026 1.4
 1418 31.129193 40.822813 12.06 20221123T080523 1.6
 1419 30.988420 40.765615 11.22 20221123T080621 1.5
 1421 31.113139 40.811903 7.73 20221123T080725 1.4
 1423 31.045472 40.804712 12.88 20221123T081042 1.8
 1425 31.017529 40.843188 14.62 20221123T082205 0.8
 1427 30.960960 40.773785 7.39 20221123T083855 1.2
 1430 31.071705 40.801621 6.89 20221123T084806 1.6
 1434 30.963047 40.766223 7.73 20221123T085618 2.1
 1436 31.140392 40.855169 12.45 20221123T092104 1.6
 1438 30.970449 40.813887 13.06 20221123T094115 2.6
 1440 31.072833 40.823133 11.98 20221123T093231 1.6
 1442 30.944937 40.826221 14.70 20221123T093450 1.6
 1444 30.920335 40.790045 10.62 20221123T093545 1.8
 1445 30.997053 40.807481 6.85 20221123T090000 1.7
 1449 31.013308 40.825756 14.23 20221123T092234 1.6
 1452 30.877197 40.783223 2.67 20221123T092704 1.7
 1453 31.070823 40.817917 11.24 20221123T092718 1.7
 1454 30.993837 40.808061 7.49 20221123T093038 1.6
 1457 30.960111 40.823690 12.65 20221123T094719 1.5
 1458 30.975585 40.815726 -0.67 20221123T094914 1.1
 1459 30.919544 40.762399 3.66 20221123T095405 1.6
 1461 30.984977 40.789657 10.85 20221123T095614 1.4
 1466 31.476348 40.788965 15.19 20221123T101053 1.8
 1467 31.034656 40.790810 12.09 20221123T104429 3.3
 1469 31.082882 40.789692 11.71 20221123T100527 2.1
 1471 30.986885 40.807305 -0.46 20221123T100627 1.3
 1473 31.044607 40.836938 7.22 20221123T102826 1.7
 1477 30.976114 40.817992 -1.08 20221123T100145 1.7
 1478 30.940820 40.731936 -0.20 20221123T101506 1.7
 1479 31.064614 40.818815 10.98 20221123T101712 1.8
 1481 31.061919 40.821314 11.09 20221123T101734 2.0
 1483 30.997718 40.814296 8.94 20221123T102500 1.4
 1484 31.028745 40.801504 12.84 20221123T102422 2.0
 1485 30.978833 40.816195 12.16 20221123T102650 1.1
 1488 31.059322 40.804467 10.81 20221123T104142 1.8
 1490 31.131129 40.840109 27.32 20221123T105250 1.8
 1491 30.985402 40.804004 7.45 20221123T105352 1.5
 1494 30.947808 40.813744 9.84 20221123T105817 1.5
 1499 31.502781 40.952622 3.35 20221123T110044 1.7
 1500 31.025519 40.801736 10.17 20221123T111256 1.4
 1502 31.160047 40.869773 14.77 20221123T111350 1.8
 1505 31.074244 40.831423 12.13 20221123T113401 2.0
 1507 31.198938 40.871319 15.26 20221123T113612 1.7
 1510 31.140170 40.862700 13.29 20221123T112615 2.1
 1511 31.093783 40.828184 3.41 20221123T113206 1.2
 1513 30.971407 40.799341 7.96 20221123T110235 1.6
 1514 30.973442 40.790029 6.26 20221123T110353 1.7
 1517 30.994437 40.797197 12.53 20221123T112105 1.3
 1519 30.964421 40.813114 9.72 20221123T113948 1.3
 1527 30.972794 40.815073 11.94 20221123T121909 2.2
 1528 31.134814 40.854221 13.47 20221123T122835 2.5
 1531 31.152743 40.836734 12.30 20221123T124816 2.3
 1533 30.954878 40.763122 4.24 20221123T121637 1.6
 1536 31.046003 40.806978 9.93 20221123T121800 1.9
 1539 31.049932 40.814612 11.57 20221123T125225 1.5
 1541 30.790927 41.045398 14.27 20221123T120235 1.5
 1543 31.019473 40.785036 11.34 20221123T120955 1.3
 1545 30.978337 40.799399 4.19 20221123T122644 1.2
 1547 30.727283 40.950440 5.44 20221123T123515 1.1
 1548 30.984987 40.782217 8.50 20221123T123748 2.4
 1551 30.983607 40.805786 5.81 20221123T124312 1.6
 1554 31.105752 40.812037 12.65 20221123T124951 1.7
 1555 31.031590 40.803905 10.30 20221123T125927 1.8
 1557 31.114619 40.858792 11.16 20221123T130957 1.8
 1558 31.070369 40.877970 13.76 20221123T131806 1.9
 1561 30.981434 40.857289 14.09 20221123T131926 3.5
 1562 31.011968 40.796545 11.05 20221123T131349 1.6
 1563 30.947247 40.746708 5.91 20221123T134113 1.7
 1564 31.063255 40.842210 17.61 20221123T134202 1.9
 1566 31.062953 40.832412 11.40 20221123T134456 1.7
 1567 31.087546 40.835649 17.51 20221123T134835 1.9
 1576 31.052164 40.827176 14.07 20221123T135327 1.7
 1577 30.939460 40.748764 4.21 20221123T135832 1.5
 1580 31.046821 40.864032 13.88 20221123T143730 2.6
 1583 30.963391 40.762191 8.21 20221123T145327 1.5
 1584 31.061310 40.839093 11.55 20221123T144852 1.5
 1586 30.409160 40.526941 11.14 20221123T141409 2.1
 1598 31.078633 40.890951 10.34 20221123T152940 1.8
 1601 31.082265 40.844146 12.90 20221123T153234 2.1
 1602 31.069657 40.839995 12.02 20221123T153729 2.0
 1605 31.092649 40.865842 13.39 20221123T152508 1.7
 1607 31.100878 40.789192 1.26 20221123T151017 1.5
 1608 31.053270 40.833109 11.22 20221123T151841 1.7
 1610 31.082167 40.855877 13.51 20221123T154346 1.7
 1617 31.059317 40.819347 14.15 20221123T153635 1.5
 1627 31.009385 40.795102 9.57 20221123T160021 2.7
 1630 31.050370 40.806289 13.15 20221123T161516 1.7
 1631 31.040560 40.825455 10.93 20221123T161636 2.0
 1634 30.981760 40.805817 15.46 20221123T162530 2.0
 1639 30.997157 40.772205 8.63 20221123T164248 3.0
 1641 31.091036 40.843814 12.76 20221123T164341 3.2
 1642 31.121027 40.885984 10.11 20221123T164844 1.9
 1644 31.186928 40.744274 5.20 20221123T165529 1.8
 1647 31.130667 40.876442 10.35 20221123T165640 1.6
 1650 31.116614 40.848777 12.94 20221123T161946 1.6
 1652 31.191755 40.729564 1.59 20221123T160247 1.6
 1653 31.089377 40.790625 13.70 20221123T165415 1.7
 1654 31.065397 40.836745 8.60 20221123T163810 1.6
 1661 30.995522 40.763830 7.74 20221123T172817 2.6
 1663 30.907707 40.768196 7.57 20221123T172931 1.4
 1666 31.184185 40.851378 11.73 20221123T173026 1.5
 1669 31.032311 40.789626 12.13 20221123T173424 2.6
 1671 31.102348 40.836082 12.04 20221123T173456 2.2
 1674 31.031482 40.876555 9.07 20221123T170839 2.9
 1678 30.959248 40.825805 11.24 20221123T171039 2.3
 1681 31.021290 40.768724 8.12 20221123T174305 1.6
 1682 30.962381 40.830216 14.08 20221123T175248 1.7
 1683 31.044955 40.795356 12.07 20221123T170709 1.7
 1685 31.039168 40.810075 10.93 20221123T170729 2.5
 1690 30.957327 40.760017 7.30 20221123T171212 1.9
 1694 31.084743 40.849529 15.85 20221123T180936 1.6
 1695 31.085820 40.854411 12.18 20221123T181601 2.1
 1697 31.189779 40.782122 15.58 20221123T182212 1.4
 1698 31.068658 40.837562 12.06 20221123T182250 1.6
 1700 31.188727 40.877201 16.26 20221123T182719 1.7
 1701 31.102014 40.810704 12.73 20221123T182932 2.7
 1703 31.138071 40.811446 11.09 20221123T183603 1.4
 1707 31.075312 40.798756 12.67 20221123T183945 1.8
 1708 31.212074 40.772070 -0.73 20221123T184829 1.5
 1709 31.105191 40.794191 13.82 20221123T185013 1.6
 1710 31.149123 40.867962 31.05 20221123T185534 1.5
 1711 30.962426 40.792316 0.48 20221123T182631 1.3
 1713 30.957357 40.761067 5.66 20221123T180120 1.9
 1715 30.982757 40.792671 10.71 20221123T181433 1.1
 1718 31.031462 40.814936 11.96 20221123T185905 1.2
 1719 31.201272 40.766499 9.13 20221123T182001 1.5
 1725 31.129682 40.881800 10.01 20221123T190550 1.4
 1726 31.017501 40.826909 13.19 20221123T191606 1.8
 1727 31.040588 40.887074 1.20 20221123T192515 1.2
 1728 31.079847 40.803489 12.97 20221123T192505 1.5
 1729 31.083372 40.805438 13.08 20221123T192847 1.6
 1730 31.191337 40.759159 7.47 20221123T193500 1.6
 1732 31.085794 40.801631 12.44 20221123T194128 1.8
 1734 31.076919 40.813344 13.99 20221123T194521 1.7
 1739 31.059704 40.831944 12.20 20221123T195229 2.3
 1740 30.987435 40.872591 0.34 20221123T195351 1.8
 1741 31.210327 40.761074 9.72 20221123T195726 1.3
 1743 30.935256 40.970973 23.72 20221123T190833 1.3
 1745 30.877571 40.846060 9.76 20221123T191442 1.8
 1747 31.047193 40.838380 11.29 20221123T192024 1.3
 1752 30.948971 40.758407 6.01 20221123T195025 1.4
 1754 31.109452 40.826850 12.43 20221123T200019 1.7
 1758 31.219925 40.855777 14.25 20221123T200256 2.2
 1759 31.084805 40.792108 13.04 20221123T201018 1.5
 1760 31.116784 40.883436 10.25 20221123T202045 1.5
 1762 31.198239 40.779599 7.19 20221123T202224 2.2
 1763 31.082797 40.846413 13.47 20221123T202349 1.8
 1764 31.130873 40.846591 12.45 20221123T202532 1.5
 1765 31.059669 40.875884 13.12 20221123T203559 2.6
 1767 31.064930 40.836578 12.65 20221123T204311 1.8
 1771 31.042499 40.798112 13.27 20221123T205401 1.8
 1772 30.881944 40.738508 0.66 20221123T200724 1.5
 1774 31.082872 40.819102 11.24 20221123T205755 2.1
 1779 30.941082 40.756964 0.87 20221123T200626 1.7
 1785 30.978163 40.785660 8.81 20221123T211717 2.7
 1787 31.155685 40.727090 8.08 20221123T211741 2.3
 1789 31.113411 40.835181 11.81 20221123T213739 1.8
 1790 31.087472 40.744268 16.53 20221123T214221 1.7
 1791 30.959428 40.768735 7.96 20221123T214257 1.6
 1793 31.076070 40.838130 15.19 20221123T210441 1.3
 1794 30.993249 40.959141 5.01 20221123T210111 1.6
 1797 30.945189 40.755320 1.20 20221123T211000 1.8
 1800 30.972619 40.762034 9.62 20221123T210741 1.2
 1803 31.078777 40.806221 12.06 20221123T220327 2.4
 1805 30.975558 40.791306 10.92 20221123T220403 1.8
 1806 31.109372 40.868340 10.30 20221123T221528 1.8
 1807 30.958311 40.762101 5.26 20221123T221739 1.3
 1809 31.044762 40.932865 8.00 20221123T222044 2.5
 1810 30.940067 40.785690 11.57 20221123T222044 1.7
 1812 31.055296 40.793685 13.04 20221123T223251 1.6
 1813 31.099633 40.882171 11.55 20221123T223723 1.9
 1815 31.039367 40.786263 11.83 20221123T223814 1.3
 1816 31.128547 40.831578 12.96 20221123T224156 2.6
 1818 31.112472 40.849378 12.53 20221123T224722 1.7
 1823 31.133121 40.830094 12.88 20221123T225031 1.8
 1824 31.078570 40.799573 12.49 20221123T225223 1.7
 1825 31.146969 40.800778 13.43 20221123T225412 1.6
 1835 30.991885 40.789014 11.03 20221123T224547 1.7
 1836 30.928064 40.753680 2.20 20221123T221232 1.3
 1838 31.139186 40.831908 13.06 20221123T230216 1.4
 1839 31.054051 40.783203 13.62 20221123T230926 1.7
 1843 31.078330 40.851394 13.16 20221123T231506 2.1
 1845 31.091222 40.849762 13.23 20221123T232029 1.4
 1848 31.090909 40.869374 12.69 20221123T233220 2.3
 1850 31.085498 40.769863 12.98 20221123T233631 1.6
 1852 31.093441 40.861626 13.39 20221123T234142 1.8
 1853 30.954163 40.762346 5.17 20221123T234216 2.0
 1854 30.992419 40.853600 12.02 20221123T235519 1.9
 1855 31.121982 40.828547 14.56 20221123T235605 1.4
 1859 30.983898 40.784424 10.89 20221123T230715 1.8
 1862 30.843570 40.735798 5.91 20221123T235819 2.1
 1865 31.526018 40.783343 10.07 20221124T000830 1.4
 1866 31.002501 40.812026 12.19 20221124T000954 1.9
 1867 31.107728 40.757382 0.34 20221124T002121 1.8
 1871 31.092971 40.846580 12.41 20221124T002428 1.6
 1873 31.139635 40.860435 11.01 20221124T002717 1.5
 1875 31.138679 40.873932 11.57 20221124T003008 1.3
 1876 31.059732 40.847874 17.02 20221124T003030 1.7
 1877 31.121877 40.781458 14.97 20221124T003148 1.4
 1878 31.161626 40.839895 12.04 20221124T003421 1.4
 1881 30.817314 40.737438 1.75 20221124T004109 1.2
 1882 31.039733 40.934879 3.64 20221124T004239 1.8
 1884 31.105779 40.827617 11.81 20221124T004703 1.4
 1887 31.039455 40.819523 14.29 20221124T005520 1.4
 1888 31.127768 40.836144 12.34 20221124T005704 1.3
 1889 31.018446 40.827592 12.65 20221124T005937 2.2
 1891 31.116550 40.832148 14.48 20221124T000352 1.5
 1892 31.066117 40.875070 12.37 20221124T000331 2.1
 1893 31.132833 40.857321 12.34 20221124T000635 1.9
 1899 30.987761 40.751185 7.77 20221124T010208 3.9
 1901 31.074626 40.821350 14.99 20221124T010953 1.5
 1904 31.073014 40.806587 12.11 20221124T011126 2.0
 1906 31.107234 40.932625 2.90 20221124T012719 1.3
 1908 31.130856 40.853331 12.27 20221124T013114 1.9
 1910 31.071736 40.817551 12.61 20221124T013700 1.7
 1916 31.117040 40.833014 14.70 20221124T014035 1.3
 1918 31.021749 40.753310 8.82 20221124T014819 2.8
 1922 31.050174 40.807430 13.08 20221124T012546 1.2
 1924 30.979886 40.773639 10.54 20221124T012952 1.3
 1925 31.049803 40.810413 14.15 20221124T020753 1.4
 1927 31.037828 40.781214 11.81 20221124T020859 1.9
 1929 31.080493 40.801989 12.57 20221124T023124 1.5
 1931 31.127702 40.819515 12.04 20221124T023420 1.5
 1932 31.114972 40.869989 10.58 20221124T023449 1.3
 1933 31.141772 40.854968 12.04 20221124T023520 1.4
 1934 31.016443 40.853185 16.79 20221124T024225 1.8
 1935 31.110267 40.852744 12.90 20221124T024302 1.3
 1938 31.116794 40.781376 8.78 20221124T025028 1.5
 1940 31.135772 40.862519 11.95 20221124T020154 1.6
 1944 31.046699 40.890293 10.40 20221124T021440 1.6
 1945 31.100231 40.842247 12.41 20221124T021701 1.5
 1948 31.114048 40.782126 11.20 20221124T022032 2.1
 1951 31.014766 40.789757 12.21 20221124T022705 1.8
 1952 31.102431 40.824001 14.05 20221124T022718 1.6
 1954 30.994996 40.784934 11.40 20221124T025718 1.5
 1959 30.942988 40.759033 4.00 20221124T025423 1.1
 1961 31.786851 40.802760 12.67 20221124T023627 1.4
 1963 31.027488 40.866822 7.35 20221124T033126 1.6
 1964 31.036580 40.846532 10.07 20221124T033829 1.6
 1969 31.056968 40.825603 12.68 20221124T032239 1.8
 1971 31.093752 40.782844 11.87 20221124T033651 1.7
 1974 31.061065 40.823605 10.51 20221124T034559 2.0
 1977 31.108483 40.796057 13.45 20221124T034845 1.8
 1979 30.997551 40.808698 15.73 20221124T035917 1.6
 1981 30.896475 40.746499 3.84 20221124T030724 1.3
 1985 31.050399 40.814778 11.94 20221124T044750 2.8
 1987 31.148584 40.851166 11.32 20221124T044927 1.4
 1991 31.051755 40.768539 14.44 20221124T043732 1.3
 1994 31.117524 40.862940 14.72 20221124T041627 1.8
 1995 31.053056 40.826110 19.19 20221124T040415 1.4
 1998 31.078471 40.855943 13.12 20221124T050532 1.8
 2001 31.031484 40.754716 8.60 20221124T050604 2.2
 2004 31.001030 40.747280 7.64 20221124T054140 2.4
 2007 31.003094 40.754597 8.63 20221124T054405 2.0
 2009 31.118254 40.827565 14.64 20221124T053419 1.5
 2010 31.000862 40.764876 7.84 20221124T050807 1.8
 2014 31.027092 40.777375 9.29 20221124T052118 1.4
 2015 30.974622 40.751672 5.77 20221124T052802 1.9
 2016 31.024631 40.772342 9.62 20221124T053338 1.8
 2019 31.028888 40.897782 9.91 20221124T064911 2.0
 2022 31.092638 40.806322 12.57 20221124T062315 1.7
 2023 30.954008 40.741167 3.66 20221124T065603 2.0
 2032 30.962145 40.766938 9.72 20221124T071346 1.8
 2033 31.040777 40.862913 14.05 20221124T074239 1.8
 2034 30.947197 40.760888 5.23 20221124T074504 1.7
 2039 31.126478 40.460647 14.82 20221124T072447 2.2
 2040 31.064880 40.819949 11.57 20221124T083705 2.7
 2044 31.038604 40.791528 12.06 20221124T081840 1.6
 2046 30.886875 40.733351 0.79 20221124T080608 1.2
 2050 31.115344 40.852477 13.31 20221124T095720 2.2
 2051 31.072109 40.874438 11.10 20221124T093314 1.6
 2052 30.957861 40.746704 4.76 20221124T093628 1.9
 2054 31.073911 40.798255 14.09 20221124T094908 1.8
 2057 31.030980 40.791400 11.99 20221124T094636 1.9
 2058 30.999768 40.898462 10.28 20221124T095430 1.5
 2062 31.053868 40.860144 14.34 20221124T105414 2.4
 2063 31.010935 40.808291 9.00 20221124T105619 0.9
 2064 30.990779 40.860630 16.98 20221124T105909 1.6
 2065 31.070402 40.804270 12.65 20221124T100426 1.8
 2066 31.119166 40.827198 12.65 20221124T102651 2.5
 2070 31.108643 40.815836 14.29 20221124T105118 2.1
 2071 31.100944 40.828142 15.12 20221124T103049 1.4
 2074 30.952155 40.756778 5.17 20221124T101733 1.5
 2075 31.050206 40.808480 11.71 20221124T102234 1.8
 2076 31.159228 40.801339 10.94 20221124T104527 1.5
 2077 31.125501 40.793821 4.68 20221124T102146 1.1
 2080 30.965583 40.813357 12.52 20221124T115054 2.3
 2083 30.998861 40.821629 11.48 20221124T110321 1.9
 2085 30.982446 40.782173 6.10 20221124T112145 1.3
 2086 30.986730 40.786476 10.81 20221124T112341 1.7
 2091 30.980930 40.808982 9.41 20221124T120849 1.9
 2095 31.684664 40.864087 11.21 20221124T122636 2.0
 2096 31.079716 40.814169 14.18 20221124T121914 1.8
 2098 30.969205 40.810845 8.81 20221124T120520 1.6
 2100 31.036790 40.807841 9.07 20221124T121438 1.4
 2101 30.864826 40.969322 20.13 20221124T122204 1.1
 2103 30.989925 40.800776 5.89 20221124T123045 1.7
 2105 31.057819 40.815698 11.51 20221124T124205 2.0
 2107 31.011995 40.812825 9.03 20221124T124827 1.5
 2111 30.970985 40.784994 8.86 20221124T130046 3.1
 2112 30.994842 40.803055 7.85 20221124T130623 2.1
 2114 31.109091 40.822743 12.31 20221124T130731 2.7
 2115 31.073197 40.864790 12.88 20221124T131444 2.0
 2117 30.972914 40.787762 8.12 20221124T132203 1.8
 2118 30.994439 40.812777 7.20 20221124T132126 1.3
 2120 31.073007 40.821292 11.99 20221124T132326 2.2
 2122 31.057667 40.750578 11.16 20221124T134824 2.2
 2123 31.020043 40.803932 13.76 20221124T130240 1.0
 2125 31.071277 40.832614 14.64 20221124T130506 1.8
 2127 31.022696 40.800034 5.44 20221124T131139 1.5
 2131 30.981947 40.796536 5.60 20221124T131930 1.2
 2132 31.006885 40.796458 10.95 20221124T132856 1.8
 2133 30.984769 40.798238 5.25 20221124T133558 1.0
 2134 30.976772 40.793298 8.04 20221124T135000 1.4
 2136 31.095149 40.916213 10.19 20221124T135331 1.4
 2137 30.985807 40.786492 10.77 20221124T135926 1.6
 2139 31.062811 40.835303 12.95 20221124T143332 2.7
 2142 31.070725 40.822208 11.31 20221124T143836 2.4
 2143 31.076460 40.850727 12.18 20221124T145346 1.9
 2144 30.983677 40.753530 7.85 20221124T140538 1.8
 2145 30.989458 40.800609 4.97 20221124T140415 1.1
 2147 30.952825 40.763944 5.58 20221124T141603 1.3
 2149 31.026450 40.832530 13.29 20221124T141735 1.7
 2150 30.988732 40.807274 7.28 20221124T141921 1.4
 2151 31.000162 40.787821 9.82 20221124T143003 1.0
 2153 30.981283 40.805300 6.96 20221124T143458 1.4
 2154 31.019762 40.825294 5.91 20221124T144033 1.5
 2159 30.972794 40.815073 -0.75 20221124T150318 1.1
 2160 31.087199 40.839331 10.58 20221124T150653 1.4
 2161 31.073331 40.839229 8.66 20221124T151115 1.6
 2167 30.992134 40.789622 11.08 20221124T153653 1.3
 2168 31.012273 40.806693 9.41 20221124T154115 1.5
 2169 30.993847 40.808411 7.41 20221124T154259 1.8
 2172 30.976823 40.795048 5.93 20221124T154359 1.7
 2175 31.726355 40.848846 1.20 20221124T160906 1.1
 2176 30.974055 40.787305 8.36 20221124T160952 1.7
 2177 31.077136 40.820343 12.31 20221124T161552 2.2
 2179 30.972492 40.773415 9.09 20221124T164143 1.6
 2183 31.122259 40.837295 12.02 20221124T163859 1.3
 2184 30.984302 40.798071 7.92 20221124T164605 1.7
 2185 31.010956 40.808991 8.21 20221124T165428 1.3
 2187 31.066684 40.818516 10.71 20221124T165618 1.6
 2188 31.121952 40.798437 14.01 20221124T171308 1.9
 2190 30.520482 40.629333 13.04 20221124T174226 1.3
 2192 30.790855 40.800692 9.31 20221124T170156 1.1
 2195 30.986947 40.809405 5.64 20221124T171139 1.2
 2196 31.021969 40.837159 13.64 20221124T172228 1.1
 2197 31.044463 40.801929 9.13 20221124T172706 1.7
 2198 31.083464 40.800973 13.05 20221124T172733 1.6
 2199 31.075177 40.854076 17.75 20221124T172818 1.5
 2201 31.000365 40.817840 12.13 20221124T173423 1.7
 2203 31.039312 40.875543 12.02 20221124T174424 1.8
 2204 31.196999 40.819274 9.19 20221124T174440 1.4
 2208 31.067470 40.799071 12.96 20221124T184107 1.5
 2210 30.992567 40.757579 8.79 20221124T184244 2.6
 2212 30.326872 40.879035 5.95 20221124T184433 2.3
 2215 31.023334 40.790570 9.85 20221124T180430 1.2
 2216 31.022815 40.788654 11.40 20221124T181406 1.3
 2217 31.115744 40.806604 13.70 20221124T182400 1.5
 2222 30.947707 40.810245 9.41 20221124T183045 1.5
 2224 30.974548 40.811892 -0.32 20221124T185126 1.1
 2225 31.008438 40.786628 6.18 20221124T185742 1.0
 2226 30.985931 40.790691 11.05 20221124T191127 1.7
 2227 31.032438 40.831900 8.70 20221124T191322 1.3
 2228 31.049996 40.816711 10.25 20221124T192658 3.0
 2230 30.978296 40.797999 8.41 20221124T192735 2.1
 2231 30.913987 40.761791 11.63 20221124T193931 2.7
 2232 30.997086 40.824110 14.21 20221124T193930 2.9
 2234 31.068544 40.803953 12.73 20221124T190103 1.6
 2237 31.010977 40.809691 9.15 20221124T192545 1.2
 2238 30.997582 40.809747 8.55 20221124T193353 1.3
 2239 31.097641 40.789076 12.80 20221124T193441 1.6
 2242 31.066597 40.815717 12.20 20221124T194331 1.1
 2243 31.070798 40.839537 17.64 20221124T195003 1.5
 2244 30.995036 40.770754 1.26 20221124T195830 1.1
 2245 30.969345 40.792024 8.43 20221124T201455 1.5
 2247 30.964688 40.822212 14.29 20221124T201601 2.1
 2248 30.888412 40.886320 17.32 20221124T200027 1.1
 2251 31.009340 40.816722 8.68 20221124T201915 1.5
 2254 31.123298 40.797187 12.59 20221124T203600 1.6
 2256 31.048673 40.811220 14.59 20221124T204049 1.7
 2257 31.096211 40.802406 12.18 20221124T204409 1.4
 2258 31.023293 40.781556 10.98 20221124T204555 1.8
 2261 31.009781 40.831419 8.84 20221124T204803 1.3
 2262 30.973896 40.805426 4.07 20221124T204904 1.1
 2266 30.975941 40.796463 9.41 20221124T215413 2.7
 2268 31.115275 40.813702 12.50 20221124T215728 2.2
 2270 31.034796 40.833434 3.25 20221124T215800 1.7
 2273 31.114272 40.818535 12.65 20221124T215839 2.1
 2275 30.989726 40.762967 11.09 20221124T210014 1.2
 2276 30.976658 40.789449 7.57 20221124T210315 1.3
 2279 31.053720 40.810081 11.78 20221124T212225 1.7
 2282 31.078310 40.798614 11.39 20221124T212501 1.9
 2284 31.031588 40.880055 0.56 20221124T212618 1.7
 2286 30.807529 40.733915 12.67 20221124T213825 1.3
 2287 30.725535 40.775075 12.67 20221124T214059 1.2
 2288 31.061250 40.822114 14.15 20221124T214151 1.4
 2289 31.084047 40.842014 -1.00 20221124T214343 1.6
 2291 31.357731 40.771565 9.02 20221124T224330 1.5
 2293 30.995874 40.760148 7.19 20221124T225756 2.1
 2294 30.977424 40.799764 8.29 20221124T220400 2.0
 2299 31.112469 40.819968 12.30 20221124T221833 1.4
 2300 30.982189 40.750054 7.11 20221124T222151 1.5
 2302 31.068852 40.783991 4.60 20221124T222523 1.6
 2303 31.125469 40.843801 13.61 20221124T222633 1.5
 2305 30.940149 40.756630 0.28 20221124T223928 1.4
 2307 31.014187 40.793530 13.37 20221124T225208 1.6
 2309 31.570012 40.798484 12.45 20221124T231912 1.0
 2310 31.089918 40.778361 12.92 20221124T230502 1.7
 2311 31.092167 40.783835 12.99 20221124T231355 1.6
 2317 31.135314 40.840907 10.77 20221124T234607 2.0
 2319 31.148827 40.844334 12.51 20221124T235457 1.2
 2320 31.006176 40.819052 10.15 20221124T235535 1.6
 2322 31.051070 40.844264 14.51 20221125T000554 2.1
 2325 31.018091 40.800465 12.75 20221125T000458 1.5
 2326 31.146195 40.819874 11.18 20221125T000857 1.4
 2330 31.123970 40.862122 12.02 20221125T002534 1.5
 2333 31.138630 40.828942 13.16 20221125T004114 1.5
 2336 30.986232 40.800839 6.79 20221125T005424 1.6
 2341 31.357780 40.792661 7.20 20221125T012422 1.8
 2342 31.085164 40.803656 12.80 20221125T015425 1.6
 2344 31.044971 40.909404 8.27 20221125T010704 1.7
 2345 31.060039 40.872902 9.89 20221125T011451 1.7
 2346 31.152298 40.837268 12.98 20221125T012936 1.0
 2347 31.280620 40.852938 14.69 20221125T012949 1.6
 2348 31.115472 40.827266 11.79 20221125T013428 1.6
 2355 31.026856 40.800137 12.26 20221125T024120 3.0
 2357 30.975734 40.797255 6.52 20221125T023204 1.9
 2358 31.082896 40.864442 13.92 20221125T020045 1.7
 2360 30.989209 40.807790 7.10 20221125T020234 1.8
 2370 31.064362 40.803152 13.21 20221125T025243 1.7
 2375 31.087481 40.833549 12.67 20221125T030255 2.0
 2377 31.091769 40.808088 10.77 20221125T032232 1.8
 2378 30.974520 40.795262 9.19 20221125T035840 3.4
 2380 31.058308 40.846674 12.67 20221125T035951 2.2
 2381 31.081677 40.810371 11.94 20221125T031026 1.6
 2382 30.996732 40.812213 7.96 20221125T031254 1.4
 2387 31.086183 40.843813 13.36 20221125T033825 1.7
 2389 31.057986 40.836176 11.89 20221125T034014 1.8
 2390 31.045717 40.812760 11.20 20221125T035129 1.8
 2397 31.065462 40.816350 11.80 20221125T040730 2.0
 2399 31.061782 40.824380 12.53 20221125T041024 2.5
 2400 31.077235 40.786292 8.00 20221125T041024 2.1
 2404 30.931076 40.746103 5.89 20221125T040437 1.6
 2406 30.975972 40.797513 7.06 20221125T042131 1.6
 2407 31.026940 40.818166 10.60 20221125T042533 1.5
 2408 30.978035 40.804830 5.15 20221125T042618 1.2
 2411 31.020654 40.824228 6.26 20221125T043301 1.9
 2414 30.937279 40.769107 8.35 20221125T044319 2.1
 2421 31.090101 40.843480 12.57 20221125T051358 2.0
 2422 31.638391 40.681389 10.58 20221125T052436 1.6
 2423 31.121275 40.791622 15.48 20221125T050235 2.0
 2425 31.069646 40.839645 17.34 20221125T050224 1.7
 2426 31.104870 40.776603 11.17 20221125T050910 2.0
 2428 30.977684 40.792933 8.39 20221125T053925 1.9
 2430 31.138844 40.763290 0.32 20221125T055543 1.9
 2433 30.985372 40.764005 7.66 20221125T062017 2.5
 2435 31.074827 40.820384 11.92 20221125T065057 2.1
 2440 30.973681 40.790287 9.36 20221125T064821 1.9
 2441 31.064125 40.840444 10.58 20221125T065202 1.7
 2442 31.056380 40.859137 10.85 20221125T065224 1.9
 2444 30.991330 40.793662 11.11 20221125T071653 2.6
 2445 30.997850 40.795476 11.09 20221125T075434 2.3
 2447 31.040846 40.819673 -0.15 20221125T075532 1.8
 2449 31.028733 40.831614 13.78 20221125T075554 1.9
 2450 31.088563 40.794141 12.65 20221125T071002 1.8
 2453 30.985485 40.806804 6.83 20221125T073333 2.0
 2455 31.103608 40.802623 9.84 20221125T073929 1.4
 2457 30.992036 40.801878 11.06 20221125T082344 2.9
 2462 30.986449 40.808188 6.44 20221125T082832 2.0
 2463 31.078026 40.826716 10.01 20221125T083528 1.6
 2467 31.125500 40.808351 14.70 20221125T084508 1.7
 2470 30.976534 40.785250 9.17 20221125T090032 3.7
 2473 31.002255 40.780608 5.66 20221125T090345 1.8
 2475 31.075821 40.822642 12.21 20221125T094512 1.9
 2479 31.005822 40.776345 10.58 20221125T091540 2.0
 2484 30.980634 40.806799 7.38 20221125T092959 2.1
 2485 30.972564 40.775864 8.86 20221125T093339 1.9
 2491 30.976101 40.770552 8.98 20221125T105238 1.7
 2493 31.027058 40.806786 9.21 20221125T102215 1.7
 2497 31.109297 40.821951 16.73 20221125T114138 3.1
 2498 31.041614 40.844868 14.31 20221125T114138 2.9
 2501 30.986040 40.786576 9.14 20221125T115829 2.2
 2502 31.079005 40.813570 12.26 20221125T110029 1.9
 2503 31.091996 40.800557 -1.16 20221125T110251 2.0
 2505 30.984854 40.738718 5.87 20221125T113110 1.6
 2506 30.981428 40.810199 5.01 20221125T113345 2.0
 2508 31.143085 40.852668 14.37 20221125T115312 1.6
 2512 31.097090 40.800990 11.87 20221125T121113 1.9
 2514 31.132621 40.843408 12.26 20221125T121730 1.8
 2518 31.111337 40.791366 12.66 20221125T123842 1.8
 2520 30.993975 40.789415 10.29 20221125T132459 2.4
 2522 30.972276 40.813156 -1.00 20221125T134239 1.9
 2523 30.982944 40.783390 10.62 20221125T134343 2.0
 2525 31.636561 40.687647 9.67 20221125T134426 2.1
 2526 31.038631 40.800018 3.85 20221125T135424 1.6
 2528 31.090689 40.810471 12.50 20221125T135444 2.3
 2531 31.112077 40.829516 14.83 20221125T131806 1.7
 2536 31.064646 40.819865 11.08 20221125T143919 2.4
 2542 30.804290 40.956623 18.14 20221125T140609 1.4
 2543 31.098057 40.802373 12.14 20221125T140721 1.8
 2544 31.085372 40.825184 10.40 20221125T141555 1.9
 2549 31.110514 40.845912 10.81 20221125T150903 2.1
 2550 31.209140 40.963295 27.94 20221125T150903 1.9
 2552 31.086274 40.831908 12.62 20221125T151840 2.2
 2554 30.979539 40.808831 -0.54 20221125T153438 1.3
 2556 31.197548 40.878260 15.19 20221125T153451 2.0
 2558 30.986263 40.801889 8.98 20221125T155318 2.2
 2562 31.092707 40.801157 12.15 20221125T154203 1.9
 2566 31.001192 40.806884 10.73 20221125T155919 1.9
 2569 31.066741 40.857815 14.45 20221125T160753 3.2
 2571 31.132476 40.846124 13.38 20221125T164828 2.6
 2573 30.972296 40.813856 -1.08 20221125T160000 1.7
 2574 30.994251 40.806479 7.59 20221125T160106 2.0
 2579 31.099461 40.773463 13.10 20221125T162508 1.6
 2580 30.888661 40.731221 1.26 20221125T163643 1.5
 2581 30.984873 40.801738 7.28 20221125T163719 1.5
 2582 31.127018 40.819790 11.60 20221125T163928 1.9
 2583 31.037994 40.725892 7.20 20221125T164233 2.3
 2584 30.975817 40.792264 4.80 20221125T164355 1.7
 2585 30.987311 40.806072 6.79 20221125T164635 1.6
 2586 31.110179 40.849945 2.51 20221125T165931 1.8
 2588 31.081091 40.836115 8.02 20221125T170557 1.9
 2592 31.042288 40.806344 8.06 20221125T170104 1.8
 2594 31.116732 40.815951 12.66 20221125T173047 1.9
 2595 31.112438 40.811653 12.21 20221125T173455 1.7
 2596 31.086224 40.748667 8.86 20221125T174840 2.0
 2597 30.745280 40.930567 0.75 20221125T175913 1.4
 2600 31.054351 40.793001 11.12 20221125T182445 2.1
 2602 30.986470 40.793308 5.79 20221125T180808 2.2
 2603 31.079221 40.865208 16.26 20221125T181652 1.8
 2604 30.975838 40.792964 9.25 20221125T181743 1.8
 2605 30.987404 40.746902 13.86 20221125T182614 1.9
 2606 31.037258 40.823237 13.53 20221125T183017 1.5
 2608 31.098287 40.809721 10.58 20221125T183405 1.7
 2609 31.047983 40.833990 13.59 20221125T184706 1.9
 2610 31.069794 40.799554 12.59 20221125T184907 1.6
 2613 31.142340 40.858284 9.95 20221125T185556 1.6
 2615 31.093539 40.805606 13.04 20221125T190317 1.9
 2617 31.006853 40.826218 11.77 20221125T195039 1.5
 2618 31.039860 40.832820 13.70 20221125T191525 1.6
 2619 31.079125 40.787659 14.17 20221125T192411 1.8
 2620 30.983716 40.801670 5.96 20221125T192640 1.9
 2622 30.997468 40.805898 7.61 20221125T193945 1.6
 2624 31.013110 40.811492 9.47 20221125T194550 1.8
 2625 31.596918 40.908714 11.26 20221125T200727 1.3
 2626 31.080341 40.819410 11.99 20221125T202957 2.1
 2628 31.034680 40.875274 12.57 20221125T204351 2.4
 2630 30.984893 40.802438 7.35 20221125T204408 2.0
 2631 31.076082 40.808720 12.06 20221125T205508 2.2
 2633 30.999857 40.824063 11.16 20221125T202529 1.9
 2637 30.989565 40.749753 7.68 20221125T203348 1.8
 2642 31.096758 40.819902 12.76 20221125T212041 2.6
 2644 31.093732 40.819169 12.70 20221125T210022 1.6
 2648 30.983513 40.802636 6.12 20221125T211107 1.7
 2651 30.988068 40.800458 9.37 20221125T211554 1.8
 2653 30.986642 40.760132 9.02 20221125T213817 1.9
 2654 31.010279 40.801826 11.24 20221125T213839 1.6
 2659 30.994976 40.792024 10.47 20221125T220106 3.4
 2662 30.997212 40.828310 13.47 20221125T220735 1.8
 2663 31.124495 40.849509 13.74 20221125T223618 1.6
 2664 30.983389 40.798437 6.87 20221125T220445 1.8
 2667 31.130406 40.831894 11.87 20221125T223456 1.7
 2669 30.984832 40.784758 10.62 20221125T225348 1.6
 2670 30.933530 40.815208 12.75 20221125T225922 2.0
 2671 31.044521 40.834138 14.33 20221125T231511 1.7
 2673 31.076402 40.826483 12.25 20221125T231451 2.2
 2675 31.035433 40.854429 16.69 20221125T232137 2.1
 2676 31.036591 40.846882 13.59 20221125T232524 2.1
 2680 31.018568 40.800982 12.88 20221125T233928 1.8
 2684 30.973148 40.811391 -0.89 20221125T234121 1.5
 2687 31.092086 40.818236 11.51 20221125T234800 1.7
 2689 31.128080 40.831412 12.67 20221125T235741 1.3
 2694 31.701230 40.844880 11.12 20221126T004910 1.6
 2696 31.022058 40.809499 14.00 20221126T000217 1.9
 2697 31.106599 40.838981 14.09 20221126T000704 1.6
 2699 30.992133 40.781832 10.50 20221126T001002 2.0
 2700 30.942439 40.883504 12.92 20221126T002441 1.2
 2704 31.123227 40.838678 13.43 20221126T005318 1.5
 2705 31.100150 40.824918 12.59 20221126T005745 1.6
 2706 31.538414 40.830170 1.26 20221126T014617 1.2
 2708 31.091831 40.854478 12.04 20221126T015112 2.1
 2710 31.044708 40.809977 11.51 20221126T015112 1.8
 2712 30.957374 40.793277 10.50 20221126T010712 1.6
 2713 31.067718 40.807119 13.43 20221126T011220 1.9
 2714 31.205267 40.930107 10.64 20221126T011806 1.5
 2715 31.071403 40.791823 10.56 20221126T012003 1.3
 2716 31.034482 40.815496 9.45 20221126T012202 1.8
 2717 30.910822 40.764119 1.22 20221126T013331 1.3
 2720 31.070361 40.787990 13.41 20221126T012550 2.0
 2725 31.136746 40.864076 11.00 20221126T022302 1.7
 2728 31.149407 40.848000 11.36 20221126T022650 1.5
 2729 31.084485 40.804106 12.46 20221126T023349 1.8
 2731 31.037341 40.795577 9.97 20221126T030010 1.7
 2733 30.974445 40.808393 -0.16 20221126T031324 1.7
 2734 31.129927 40.845908 12.53 20221126T032843 1.8
 2735 31.108067 40.841580 1.57 20221126T033640 2.2
 2737 31.014301 40.766569 8.72 20221126T034651 1.9
 2738 30.981614 40.816498 0.01 20221126T034702 1.6
 2741 31.135831 40.900593 7.90 20221126T035834 1.5
 2745 30.977341 40.796965 9.23 20221126T043657 2.6
 2746 30.977590 40.797573 9.32 20221126T043801 3.0
 2749 30.983047 40.802469 8.60 20221126T043925 2.4
 2752 30.743593 40.936894 0.83 20221126T040624 1.4
 2757 31.115827 40.779993 11.01 20221126T045004 1.6
 2761 31.001172 40.806184 10.15 20221126T051444 2.4
 2764 30.949605 40.811963 10.07 20221126T050446 1.9
 2765 30.972794 40.815073 -1.02 20221126T051550 1.7
 2767 30.977734 40.810262 0.32 20221126T053537 1.6
 2770 31.555906 40.973701 32.24 20221126T062957 1.3
 2774 31.155196 40.833975 12.89 20221126T061444 1.8
 2775 31.082155 40.803447 12.72 20221126T061755 1.8
 2777 30.982695 40.790571 9.85 20221126T062249 1.6
 2778 30.981708 40.804068 6.01 20221126T062844 1.9
 2781 30.972152 40.808957 -0.61 20221126T064356 1.6
 2784 31.073883 40.804821 12.27 20221126T073231 3.1
 2785 30.249784 40.761920 29.19 20221126T073242 2.7
 2786 31.074621 40.813735 12.42 20221126T073749 2.1
 2789 31.029445 40.809370 11.34 20221126T072116 2.1
 2790 31.131318 40.831527 12.14 20221126T072221 1.9
 2794 31.764931 40.814578 10.04 20221126T080142 1.6
 2795 31.128280 40.844975 12.17 20221126T080309 2.0
 2796 31.136629 40.853137 13.23 20221126T085124 2.0
 2797 31.037471 40.830236 11.26 20221126T081742 2.2
 2800 31.003311 40.792756 10.94 20221126T080900 2.0
 2801 31.024344 40.778124 0.58 20221126T081001 1.5
 2802 31.139566 40.843805 17.28 20221126T081033 1.6
 2803 31.016476 40.808195 8.76 20221126T083442 1.5
 2804 31.064786 40.801919 10.15 20221126T085627 2.0
 2809 31.094699 40.842697 13.27 20221126T095635 3.0
 2810 31.132823 40.893296 11.69 20221126T095636 2.6
 2813 30.982580 40.802302 5.77 20221126T093558 1.8
 2814 30.980702 40.801284 5.89 20221126T094612 1.8
 2815 30.984727 40.796839 5.09 20221126T094939 1.7
 2816 31.128780 40.846192 12.21 20221126T095440 1.8
 2819 31.057755 40.873817 12.80 20221126T100648 2.7
 2822 31.043122 40.848868 13.82 20221126T100854 2.3
 2829 31.034195 40.806048 10.35 20221126T111434 1.8
 2830 30.973357 40.802809 4.41 20221126T110426 1.9
 2835 30.876962 40.774824 12.20 20221126T114817 1.5
 2840 31.392075 40.899454 15.28 20221126T121324 1.2
 2841 30.846433 40.873341 14.85 20221126T121708 1.9
 2843 30.955308 40.754099 9.29 20221126T123941 1.7
 2844 31.032842 40.799507 4.15 20221126T124251 1.9
 2846 30.998091 40.811314 11.18 20221126T132118 2.0
 2847 31.077766 40.803438 12.69 20221126T132158 1.8
 2849 31.050928 40.809430 7.38 20221126T134620 2.3
 2851 31.072700 40.796439 11.84 20221126T131926 1.8
 2853 31.057019 40.804683 11.10 20221126T144343 1.8
 2855 31.010164 40.797976 11.44 20221126T141009 1.6
 2857 30.987590 40.760991 9.28 20221126T141729 1.9
 2858 30.959127 40.742656 6.65 20221126T142042 2.1
 2861 31.004151 40.813135 10.42 20221126T145003 1.6
 2863 31.024344 40.778124 10.69 20221126T151421 2.7
 2864 31.017583 40.791283 9.57 20221126T155022 1.9
 2869 30.984852 40.801038 7.20 20221126T154436 1.7
 2870 30.997861 40.803616 12.98 20221126T152537 2.0
 2875 31.024603 40.832562 13.29 20221126T162216 1.4
 2876 31.151761 40.863712 10.66 20221126T162929 1.5
 2878 31.110620 40.863941 10.79 20221126T164203 1.7
 2879 31.049525 40.801314 12.28 20221126T164445 1.3
 2881 30.977060 40.803096 5.23 20221126T164921 1.4
 2885 30.980422 40.799626 8.95 20221126T173338 1.7
 2886 31.016076 40.794898 11.42 20221126T173503 1.3
 2888 30.756749 40.944398 7.63 20221126T174115 1.7
 2890 31.068965 40.817600 11.79 20221126T182102 1.9
 2891 31.140768 40.838006 11.71 20221126T183626 1.8
 2893 30.922693 40.775651 5.23 20221126T185426 2.0
 2894 30.986781 40.803806 7.20 20221126T185557 1.9
 2896 31.467474 40.811390 2.04 20221126T192436 1.2
 2897 31.200816 40.851064 9.15 20221126T191607 1.8
 2898 31.072605 40.815785 11.75 20221126T193928 1.8
 2900 30.963835 40.753693 10.33 20221126T203209 2.4
 2903 30.995372 40.805321 12.99 20221126T205209 1.5
 2911 30.976782 40.793648 16.05 20221126T212240 1.7
 2914 31.288214 40.865481 13.29 20221126T215233 2.0
 2915 30.958283 40.776982 9.07 20221126T215636 1.5
 2917 30.956408 40.783928 7.40 20221126T224542 1.8
 2919 31.157350 40.836299 12.30 20221126T221258 1.8
 2925 31.109455 40.885670 9.85 20221126T222847 1.4
 2928 31.132120 40.856721 12.02 20221126T224816 1.6
 2930 31.077956 40.817002 12.27 20221126T233609 2.1
 2933 31.023932 40.802726 11.58 20221126T233655 1.4
 2935 30.964914 40.766891 9.99 20221126T230003 1.7
 2936 31.133973 40.835067 12.44 20221126T230457 1.8
 2938 31.130617 40.853073 11.34 20221126T231034 1.5
 2939 31.112709 40.798256 11.67 20221126T231417 1.5
 2940 31.125189 40.798553 11.73 20221126T231515 1.4
 2942 30.972969 40.773932 10.32 20221126T233135 2.0
 2943 30.966349 40.784373 9.99 20221126T234154 1.4
 2947 31.024159 40.817865 16.10 20221126T235542 1.7
 2948 30.985288 40.768995 11.32 20221126T235946 1.7
 2950 31.108725 40.803755 13.29 20221127T001409 1.8
 2952 31.133356 40.851972 11.77 20221127T001748 1.3
 2960 30.999904 40.794653 10.89 20221127T015755 2.2
 2963 31.132705 40.867827 10.92 20221127T012254 1.5
 2965 31.119246 40.815118 11.07 20221127T013743 1.4
 2968 31.051412 40.757341 11.94 20221127T014143 1.5
 2969 31.122915 40.836145 14.53 20221127T015011 1.6
 2971 31.067566 40.862090 13.19 20221127T015336 1.7
 2974 31.143093 40.896258 9.15 20221127T015928 1.3
 2977 31.090592 40.822202 12.95 20221127T020641 2.3
 2978 31.102726 40.730338 4.54 20221127T020332 1.7
 2985 31.049697 40.852253 14.52 20221127T033052 2.8
 2987 31.043552 40.878094 14.03 20221127T035745 4.4
 2989 31.058490 40.822513 14.27 20221127T035745 4.4
 2991 31.067647 40.834779 17.37 20221127T033346 1.6
 2994 31.027261 40.790589 11.47 20221127T035902 3.5
 2997 31.057119 40.860612 14.75 20221127T040133 2.8
 2998 31.088273 40.918262 11.96 20221127T040508 1.8
 3002 31.040034 40.868878 14.17 20221127T042456 2.2
 3005 31.056079 40.849339 14.80 20221127T043441 2.6
 3007 31.071429 40.837513 17.41 20221127T041536 1.9
 3008 31.055134 40.848656 15.34 20221127T041657 1.5
 3010 31.016977 40.840222 14.99 20221127T040405 1.4
 3013 31.065728 40.839978 17.19 20221127T040842 1.5
 3015 31.016491 40.831740 11.99 20221127T041335 1.7
 3016 31.031886 40.828933 13.60 20221127T042015 1.5
 3018 31.036325 40.838134 13.23 20221127T043221 1.6
 3019 30.759099 40.681795 11.14 20221127T045805 1.4
 3020 31.025446 40.891015 5.91 20221127T045937 1.6
 3024 31.050694 40.847071 14.26 20221127T050710 2.4
 3026 31.108489 40.810937 16.32 20221127T051310 2.5
 3027 31.055042 40.860736 12.28 20221127T051310 2.1
 3028 30.971500 40.802491 -0.20 20221127T055546 1.7
 3029 30.989769 40.795527 9.56 20221127T055625 1.2
 3030 31.054909 40.811198 11.44 20221127T055754 1.9
 3035 31.069700 40.841395 16.98 20221127T052123 1.5
 3037 31.056740 40.855805 16.18 20221127T052223 1.7
 3038 31.027650 40.833997 13.93 20221127T052506 1.6
 3040 30.992639 40.876528 0.71 20221127T053358 1.8
 3043 30.984515 40.781875 10.08 20221127T054756 1.7
 3045 30.977530 40.787684 10.58 20221127T055409 1.4
 3048 31.069560 40.836846 15.77 20221127T060253 2.0
 3050 31.054028 40.812614 12.22 20221127T062522 1.8
 3051 31.082465 40.813420 13.75 20221127T063035 1.6
 3055 31.102332 40.820852 11.24 20221127T065836 1.5
 3056 30.986802 40.804506 6.96 20221127T074302 1.6
 3058 31.007470 40.877673 20.09 20221127T074441 1.9
 3060 31.032375 40.860260 14.48 20221127T074442 2.4
 3061 30.999566 40.791070 10.72 20221127T070351 1.9
 3063 31.090868 40.808805 12.18 20221127T073212 1.7
 3064 31.066881 40.809935 13.00 20221127T075549 1.8
 3069 31.072299 40.835747 17.30 20221127T081450 1.7
 3070 30.981614 40.816498 -0.22 20221127T082833 1.5
 3072 31.460370 40.819244 15.09 20221127T084242 1.3
 3073 31.062903 40.815782 11.96 20221127T084634 1.5
 3074 31.042973 40.843969 16.01 20221127T085029 1.8
 3075 30.999833 40.807783 7.20 20221127T085450 1.8
 3079 31.038385 40.837485 14.01 20221127T090017 2.4
 3080 31.155754 40.836941 12.25 20221127T091511 1.9
 3082 30.981823 40.792337 5.60 20221127T092301 1.3
 3084 30.975371 40.792797 9.31 20221127T093521 1.8
 3085 31.188242 40.805785 14.54 20221127T094033 1.5
 3086 30.998851 40.798084 11.19 20221127T102214 2.7
 3088 30.784773 40.849799 1.26 20221127T101835 1.5
 3090 30.971473 40.785861 7.51 20221127T103847 1.2
 3091 30.976891 40.789533 8.83 20221127T104230 2.1
 3094 31.014834 40.753606 8.68 20221127T112635 3.0
 3095 31.514287 40.766089 10.38 20221127T115940 1.8
 3098 30.987549 40.759591 8.69 20221127T111109 2.5
 3100 31.009500 40.752736 8.44 20221127T112820 2.6
 3101 30.989946 40.809266 7.11 20221127T111702 1.9
 3103 30.953038 40.763328 9.83 20221127T112916 1.8
 3105 31.106263 40.843013 -0.77 20221127T120100 1.4
 3106 31.026492 40.833929 13.84 20221127T120548 1.5
 3108 31.099864 40.815820 12.35 20221127T123148 1.8
 3110 31.159198 40.836264 12.49 20221127T123215 1.5
 3116 30.999229 40.795277 11.09 20221127T130508 2.3
 3119 30.979591 40.716750 9.66 20221127T131504 1.5
 3120 31.073660 40.805087 10.32 20221127T133221 1.8
 3122 30.986781 40.803806 7.04 20221127T134113 1.2
 3125 30.960322 40.815109 6.53 20221127T142301 2.7
 3126 31.158097 40.837948 12.56 20221127T142259 2.9
 3128 31.154914 40.839582 12.48 20221127T142546 1.9
 3131 30.930309 40.783577 10.50 20221127T140015 1.6
 3136 31.035531 40.644706 19.31 20221127T144403 1.7
 3139 30.916134 40.917725 -0.38 20221127T151810 1.7
 3140 31.003489 40.798705 11.21 20221127T154859 1.8
 3144 31.101200 40.814220 11.20 20221127T153539 1.6
 3145 31.092171 40.806156 10.71 20221127T154416 1.3
 3146 31.074240 40.816368 12.46 20221127T161428 1.9
 3148 31.006074 40.807938 12.97 20221127T164330 2.3
 3151 30.983524 40.802986 9.68 20221127T160808 1.7
 3152 30.942258 40.781627 0.73 20221127T161620 1.7
 3154 30.749456 40.948709 0.44 20221127T164553 1.7
 3156 31.246059 40.587416 -0.20 20221127T174837 1.6
 3157 31.056246 40.839708 17.35 20221127T174836 2.0
 3159 30.997082 40.792951 10.97 20221127T175933 1.8
 3161 31.159871 40.835639 12.27 20221127T170337 1.7
 3163 31.009608 40.810240 9.13 20221127T170611 1.5
 3164 30.757411 40.969593 -0.97 20221127T170816 1.3
 3166 30.980568 40.796735 6.28 20221127T173047 1.2
 3170 31.006450 40.797341 11.16 20221127T175649 1.3
 3172 31.074621 40.813735 12.09 20221127T180711 1.9
 3174 31.029784 40.828182 11.39 20221127T182822 1.8
 3176 31.672600 40.857274 8.37 20221127T180022 1.1
 3177 31.035964 40.841466 16.10 20221127T185440 1.4
 3178 30.741543 40.929223 2.00 20221127T182319 1.1
 3182 30.994018 40.752040 8.08 20221127T191454 3.4
 3183 30.997367 40.794784 11.08 20221127T194515 2.4
 3186 31.027620 40.810102 12.75 20221127T193101 1.3
 3187 31.017803 40.806247 8.19 20221127T193943 1.5
 3189 31.116433 40.835739 13.11 20221127T205059 2.5
 3191 31.052936 40.852371 15.40 20221127T205613 1.7
 3195 31.103596 40.831683 14.91 20221127T203640 1.4
 3198 31.155838 40.839565 12.42 20221127T212710 2.2
 3201 30.421594 40.680125 11.22 20221127T212136 1.3
 3203 30.458903 40.742326 6.34 20221127T212543 1.5
 3206 31.047639 40.815177 11.12 20221127T215305 1.6
 3208 31.062386 40.821481 11.21 20221127T214957 1.7
 3211 31.038503 40.795819 13.01 20221127T215931 1.3
 3213 31.049183 40.790117 10.87 20221127T225341 3.2
 3214 31.190140 40.637683 6.73 20221127T225342 2.9
 3217 30.450843 40.796338 1.34 20221127T221206 1.3
 3218 30.409398 40.670122 8.45 20221127T221249 1.2
 3219 30.362260 40.664035 9.35 20221127T221418 1.2
 3220 30.422523 40.680464 11.10 20221127T221657 1.5
 3221 30.459439 40.682105 7.59 20221127T222247 1.4
 3222 31.014267 40.734709 9.15 20221127T220235 1.4
 3225 30.987352 40.799682 11.08 20221127T220559 1.8
 3229 31.187847 40.864438 16.12 20221127T224529 1.5
 3232 30.969818 40.808121 -0.87 20221127T225506 1.3
 3233 31.182564 40.915130 9.70 20221127T234424 1.6
 3235 30.251777 40.670882 7.47 20221127T235402 1.2
 3237 30.979262 40.783803 10.19 20221127T235755 1.5
 3241 31.124653 40.825347 12.41 20221127T234038 1.3
 3243 31.133909 40.782287 3.29 20221127T230635 1.7
 3244 31.014187 40.793530 1.26 20221128T001319 1.2
 3245 31.089284 40.832116 11.18 20221128T001346 1.5
 3246 31.077494 40.824450 11.20 20221128T000303 1.4
 3252 30.988151 40.787677 1.26 20221128T003926 1.1
 3253 31.037946 40.800293 5.77 20221128T005256 1.3
 3254 30.994708 40.806296 10.93 20221128T010816 1.9
 3256 31.077493 40.854210 15.19 20221128T010329 1.4
 3258 31.068077 40.803786 1.26 20221128T010921 1.3
 3261 31.073131 40.877570 17.32 20221128T021925 1.4
 3262 31.153156 40.806441 5.56 20221128T024944 1.6
 3263 30.738278 40.946076 3.57 20221128T020947 1.2
 3265 30.983485 40.754846 1.26 20221128T022750 1.4
 3266 30.751069 40.939582 6.14 20221128T022935 1.2
 3267 31.040720 40.830704 13.90 20221128T023721 1.6
 3268 30.736046 40.931406 1.77 20221128T024541 1.2
 3269 31.136593 40.823028 7.53 20221128T030617 1.9
 3270 31.166414 40.802168 7.22 20221128T032106 1.7
 3273 30.740075 40.943948 1.61 20221128T030418 1.5
 3274 30.958072 40.785563 1.20 20221128T033830 1.2
 3276 31.850336 40.144541 5.21 20221128T041907 2.4
 3277 31.145862 40.823907 7.73 20221128T042757 1.8
 3278 31.725711 40.884142 2.58 20221128T043002 1.4
 3279 31.544420 40.793621 13.76 20221128T045043 1.1
 3282 31.034880 40.805773 12.12 20221128T053148 1.4
 3286 30.960973 40.821575 12.61 20221128T062730 1.9
 3291 31.167838 40.803367 7.20 20221128T070827 2.1
 3292 30.187050 40.763980 26.22 20221128T070839 1.9
 3294 30.748294 40.921945 1.40 20221128T072843 1.4
 3297 31.079917 40.857843 16.85 20221128T080621 1.6
 3300 30.975704 40.788415 9.64 20221128T085959 1.7
 3301 31.024312 40.777074 7.76 20221128T092230 2.0
 3302 31.752471 40.809359 0.15 20221128T094036 1.6
 3303 30.887489 40.738768 1.20 20221128T094045 1.6
 3304 31.059971 40.810583 1.22 20221128T090059 1.5
 3308 30.983359 40.781807 3.96 20221128T095806 1.5
 3311 31.499324 40.723867 21.34 20221128T103204 1.6
 3313 31.093258 40.811388 7.00 20221128T103937 1.4
 3314 31.092471 40.786193 1.85 20221128T104653 1.4
 3316 30.950900 40.777106 5.71 20221128T105241 1.4
 3318 30.934748 40.809411 12.49 20221128T114925 2.5
 3319 30.992569 40.780949 1.22 20221128T111225 1.7
 3320 30.985019 40.775477 1.22 20221128T112937 1.6
 3327 30.753194 40.950053 -0.81 20221128T121731 1.6
 3328 31.681473 40.801741 9.78 20221128T131111 1.1
 3329 31.623707 40.718667 1.14 20221128T145241 0.7
 3332 31.092952 40.801590 1.22 20221128T150605 1.3
 3333 30.892844 40.748659 13.76 20221128T151010 1.6
 3335 31.055644 40.820113 13.14 20221128T161914 1.5
 3338 30.730658 40.937787 -0.65 20221128T165156 1.4
 3341 31.023332 40.805800 12.53 20221128T184115 1.4
 3342 30.905116 40.953265 25.60 20221128T184747 1.2
 3343 30.738024 40.936277 1.22 20221128T185232 1.2
 3344 30.900679 40.878593 21.05 20221128T190150 1.4
 3346 31.141839 40.857068 11.18 20221128T205903 1.7
 3347 30.864529 40.842419 13.47 20221128T204708 1.6
 3348 31.125855 40.819548 19.93 20221128T201103 1.4
 3349 30.300360 40.656694 -0.69 20221128T215330 1.4
 3350 31.062860 40.814383 -1.16 20221128T210849 1.3
 3351 30.993379 40.792664 1.20 20221128T213651 1.6
 3352 31.002858 40.785324 1.26 20221128T222131 1.2
 3353 30.659813 40.712492 15.23 20221128T222138 1.4
 3354 31.054212 40.788452 6.91 20221128T220619 1.4
 3355 31.045725 40.797880 10.71 20221128T220948 1.4
 3356 30.945667 40.803627 10.89 20221128T223015 1.6
 3357 31.509756 40.780719 13.88 20221128T234402 1.1
 3359 31.055548 40.786853 1.22 20221128T233846 1.5
 3360 30.746156 40.964162 0.13 20221128T234633 1.1
