# Supplementary material for: The 2022 M W 6.0 Gölyaka–Düzce earthquake: an example of a medium-sized earthquake in a fault zone early in its seismic cycle
Source: Copernicus journal article supplement (doi:10.5194/se-14-1103-2023), 2023-10-25
Supplement: Supplementary file 1 [file se-14-1103-2023-supplement.zip › se-14-1103-2023-supplement-title-page.pdf]

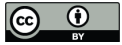

## *Supplement of*

# **The 2022 $M_W$ 6.0 Gölyaka–Düzce earthquake: an example of a medium-sized earthquake in a fault zone early in its seismic cycle**

**Patricia Martínez-Garzón et al.**

*Correspondence to:* Patricia Martínez-Garzón ([patricia@gfz-potsdam.de](mailto:patricia@gfz-potsdam.de))

- [se-14-1103-2023-supplement-title-page.pdf](#)
- [catalog\\_absolute\\_locations.txt](#)
- [supplement.pdf](#)

The copyright of individual parts of the supplement might differ from the article licence.
